# Supplementary material for: A ZrO2-RGO composite as a support enhanced the performance of a Cu-based catalyst in dehydrogenation of diethanolamine
Source: Royal Society of Chemistry journal article supplement (doi:10.1039/c9ra05458h), 2019-01-01
Supplement: c9ra05458h1.pdf [file c9ra05458h1.pdf]

## Support information

### Preparation of ZrO<sub>2</sub>

4.62g of ZrO(NO<sub>3</sub>)<sub>2</sub>·5H<sub>2</sub>O was dissolved in 500 ml of water, and a 1 mol/L NaOH solution was added to the above solution to pH 7, and stirring was continued for 6 hours at room temperature. After filtration, washing, drying, and grinding, the abrasive powder in the muffle furnace was calcined at 550°C for 4 hours to obtain a ZrO<sub>2</sub> sample.

### Preparation of Cu/ZrO<sub>2</sub>

4.62g of ZrO(NO<sub>3</sub>)<sub>2</sub>·5H<sub>2</sub>O and 2.42g of Cu(NO<sub>3</sub>)<sub>2</sub>·3H<sub>2</sub>O was dissolved in 500 ml of water, and a 1 mol/L NaOH solution was added to the above solution to pH 12, and stirring was continued for 12 hours at room temperature. After filtration, washing, drying, and grinding, the abrasive powder in the muffle furnace was calcined at 550°C for 4 hours to obtain a CuO-ZrO<sub>2</sub> sample. CuO-ZrO<sub>2</sub> in a sample of the tube furnace under hydrogen atmosphere 350 °C reduction for 4 hours to obtain a Cu/ZrO<sub>2</sub> sample.

### Preparation of Cu/RGO

1g of GO and 2.42g of Cu(NO<sub>3</sub>)<sub>2</sub>·3H<sub>2</sub>O was dissolved in 500 ml of water, and a 1 mol/L NaOH solution was added to the above solution to pH 12, and stirring was continued for 12 hours at room temperature. After filtration, washing, drying, and grinding, Then the grinding powder at 550 °C under nitrogen atmosphere in the roaster roasting 4 hours, then pass into the hydrogen reduction under 350 °C 4 hours to get the sample of Cu/RGO.
